# Supplementary material for: One-step synthesis of polylactide macrocycles from sparteine-initiated ROP
Source: Royal Society of Chemistry journal article supplement (doi:10.1039/c3py01380d), 2013-11-29

- Supporting Information -

## One-Step Synthesis of Polylactide Macrocycle from Sparteine-Initiated ROP.

O. Coulembier<sup>a\*</sup>, J. De Winter<sup>a,b</sup>, T. Josse<sup>a,b</sup>, L. Mespouille<sup>a</sup>, P. Gerbaux<sup>b</sup>, Ph. Dubois<sup>a</sup>.

- a) Laboratory of Polymeric and Composite Materials, Center for Innovation and Research in Materials and Polymers (CIRMAP), University of Mons (UMONS), Place du Parc 23, 7000 Mons, Belgium
- b) Interdisciplinary Center for Mass Spectrometry (CISMa), Mass Spectrometry Group, University of Mons, 23 Place du Parc, B-7000 Mons, Belgium

### Experimental section

**Materials.** L-Lactide (L-LA, GALACTIC, Belgium) was recrystallized twice from dried toluene and stored in a glove box under dry nitrogen atmosphere before use. CH<sub>2</sub>Cl<sub>2</sub> was dried over CaH<sub>2</sub> for 48 hours at r.t., distilled under reduced pressure and stored in a glove box under dry nitrogen atmosphere before use. Toluene was dried using a MBraun Solvent Purification System (model MB-SPS 800) equipped with alumina drying columns. (+)-Sparteine (SP, 97%, ABCR) was dried over BaO, distilled and stored in a glove box. Thiourea has been prepared by addition of cyclohexylamine to 3,5-bis(trifluoromethyl)phenyl isothiocyanate as reported in *Macromolecules* 2006, 39, 7863.

**Characterizations.** <sup>1</sup>H NMR spectra were recorded using a Bruker AMX-500 apparatus at r.t. in CDCl<sub>3</sub> (4mg/0.6ml). Size exclusion chromatography (SEC) was performed in THF (with 2% triethylamine added) at 35 °C using a Polymer Laboratories liquid chromatograph equipped with a PL-DG802 degasser, an isocratic HPLC pump LC 1120 (flow rate = 1 mL/min), a Marathon autosampler (loop volume = 200 μL, solution conc. = 1 mg/mL), a PL-DRI refractive index detector and three columns: a PL gel 10 μm guard column and two PL gel Mixed-B 10 μm columns (linear columns for separation of MW<sub>PS</sub> ranging from 500 to 10<sup>6</sup> daltons). Poly(styrene) standards were used for calibration. Polymerization conversions were checked by integration of PLA and LA signals. Matrix-assisted laser desorption ionization-time-of-flight (MALDI-ToF) mass spectra were recorded using a Waters QToF Premier mass spectrometer equipped with a nitrogen laser of 337 nm with a maximum output of 500 J/m<sup>2</sup> delivered to the sample in 4 ns pulses at 20 Hz repeating rate. Time-of-flight mass analyses were performed in the reflectron mode at a resolution of about 10 000. The matrix, trans-2-[3-(4-tert-butyl-phenyl)-2-methyl-2-propenylidene]malonitrile (DCTB), was prepared as a 40 mg/mL solution in chloroform. The matrix solution (1 μL) was applied to a stainless steel target and air-dried. Polymer samples were dissolved in chloroform to obtain 1 mg/mL solutions. Then, 1 μL aliquots of these solutions were applied onto the target area (already bearing the matrix crystals) and then air-dried. Finally, 1 μL of a solution of NaI (2 mg/mL in acetonitrile: water (1:1)) was applied onto the target plate.

**Polymerization procedure.** In a glove box, a dried vial equipped by a stirrer is charged with L-lactide (0.2 g,  $1.4 \times 10^{-3}$  mol) and SP (1  $\mu$ l,  $4.67 \times 10^{-6}$  mol) in 0.49 ml of dry  $\text{CH}_2\text{Cl}_2$ . The sealed vial is then maintained under agitation and several withdrawals were performed to follow the kinetics by SEC.

**Figure SI1 – SEC traces evolution**

(cfr. Table 1, entry 3 to 7)

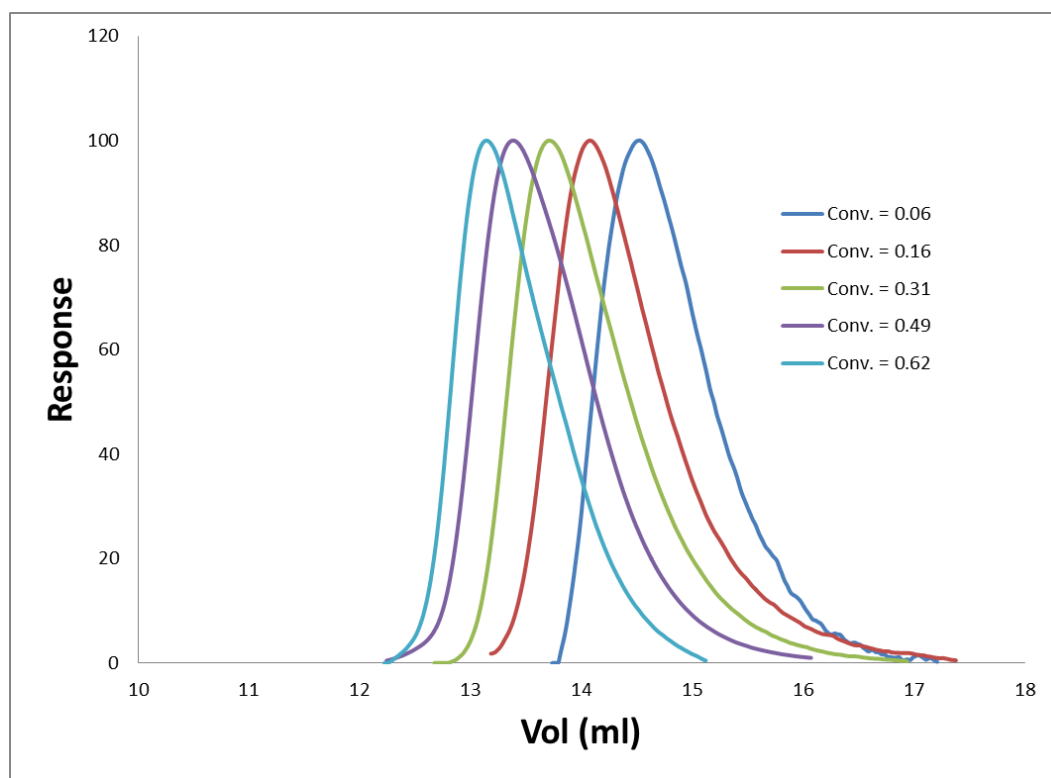

**Figure SI2**

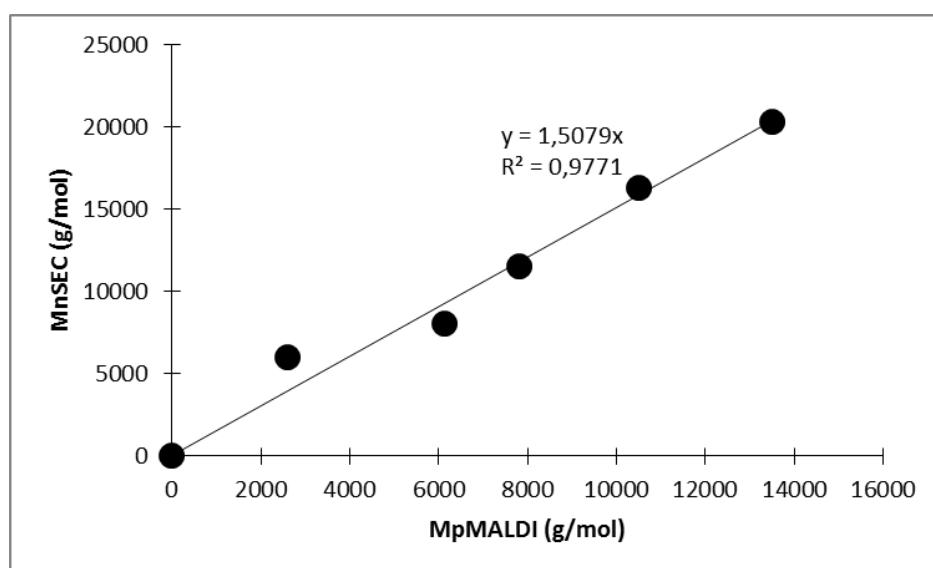

### Figure SI3 – $^1\text{H}$ NMR

(cfr. Table 1, entry 5: crude medium)

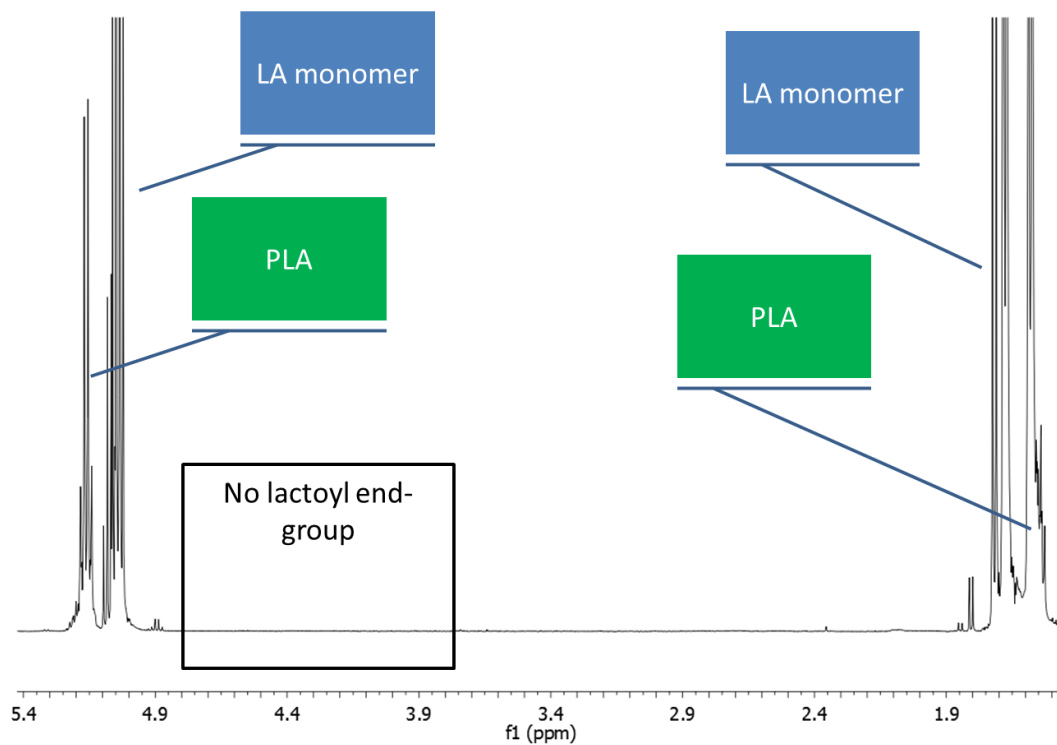

**Figure SI4 – Semilog plots and MnSEC evolutions for two polymerization processes realized with and without thiourea ( $[\text{LA}]_0/[\text{SP}]_0 = 300$ ;  $\blacklozenge$  no thiourea;  $\blacksquare$  with thiourea,  $[\text{SP}]_0/[\text{thiourea}]_0 = 1$ )**

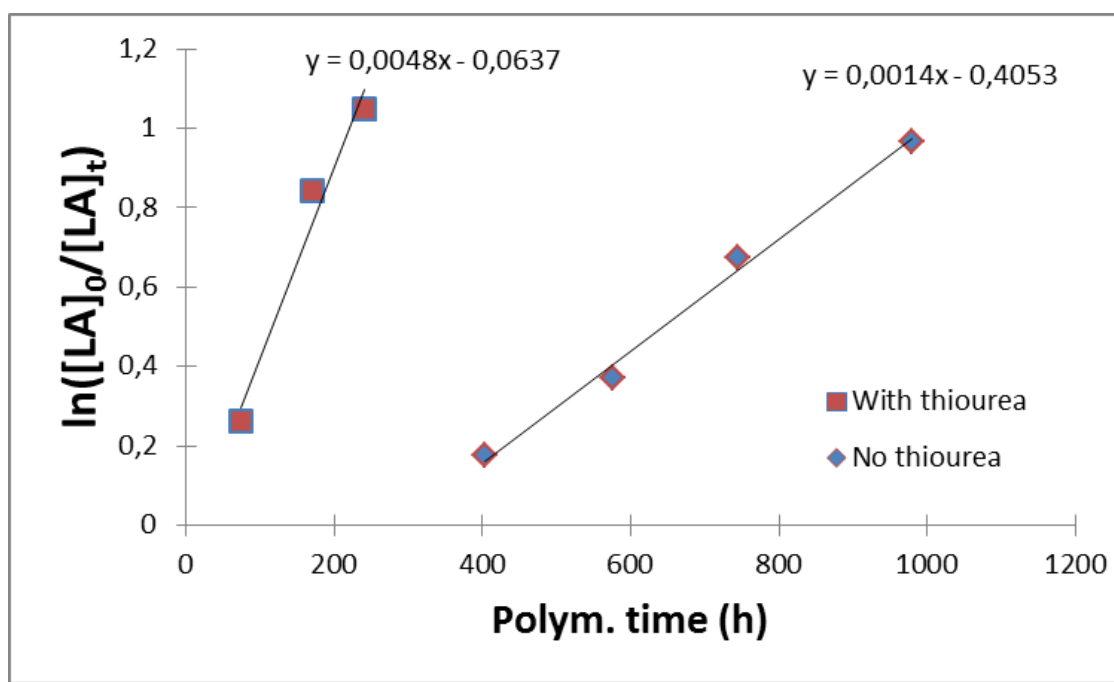

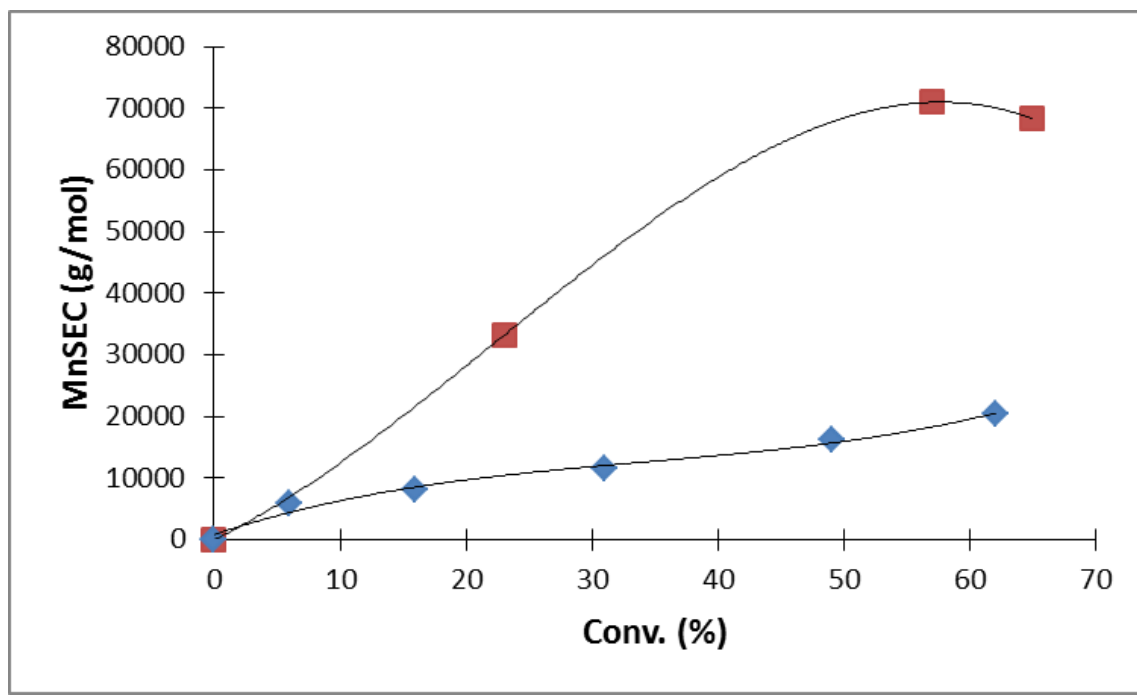

Supplement: c3py01380d.pdf [file c3py01380d.pdf]
